# Supplementary material
Source: PubMed Central journal article supplement (PMC4649664)
Supplement: supp_115.182725_FigureS2.pdf [file supp_115.182725_FigureS2.pdf]

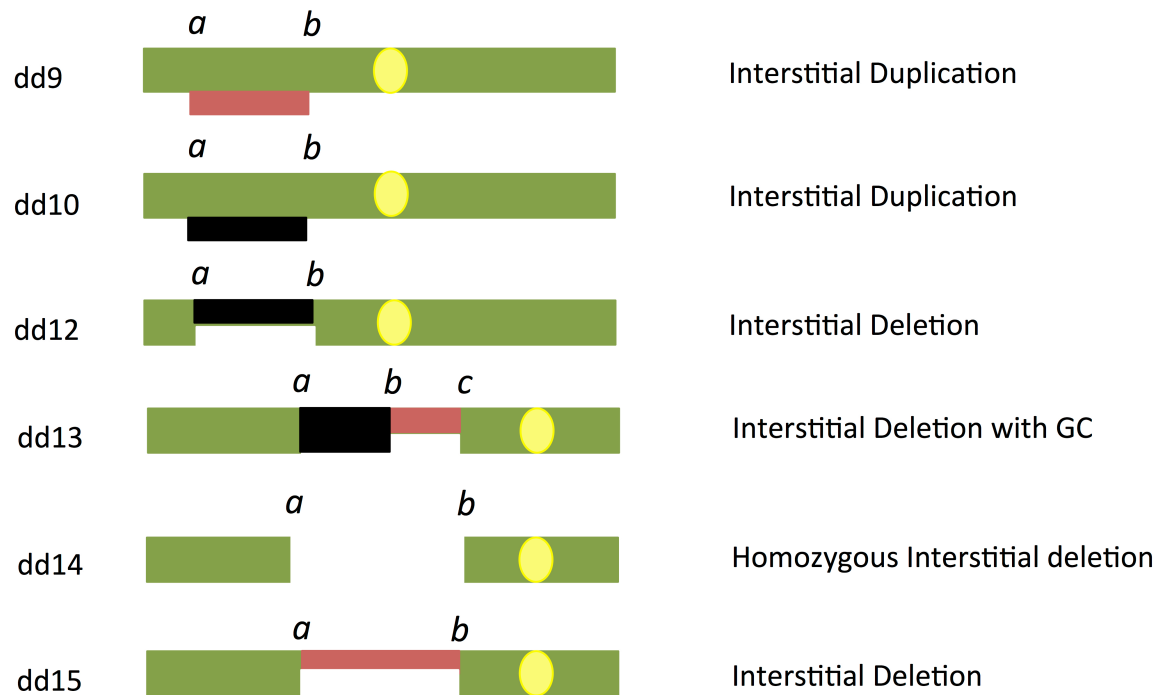

**Figure S2. Deletions and duplications in sub-cultured strains.** This diagram shows the patterns of deletions and duplications in diploid isolates. As in Fig. S1, the green line indicates heterozygous SNPs, and yellow circles show the centromere. The deletion or duplication is shown as line that is half as wide as the green lines. The Classes dd9 and dd10 show interstitial duplications of W303-1A-derived and YJM789-derived SNPs, respectively. The Class dd12 shows an interstitial deletion in which W303-1A-derived SNPs were removed. The coordinates for the transitions are in Table S6.
