# Supplementary material
Source: PubMed Central journal article supplement (PMC4649664)
Supplement: supp_115.182725_FigureS3.pdf [file supp_115.182725_FigureS3.pdf]

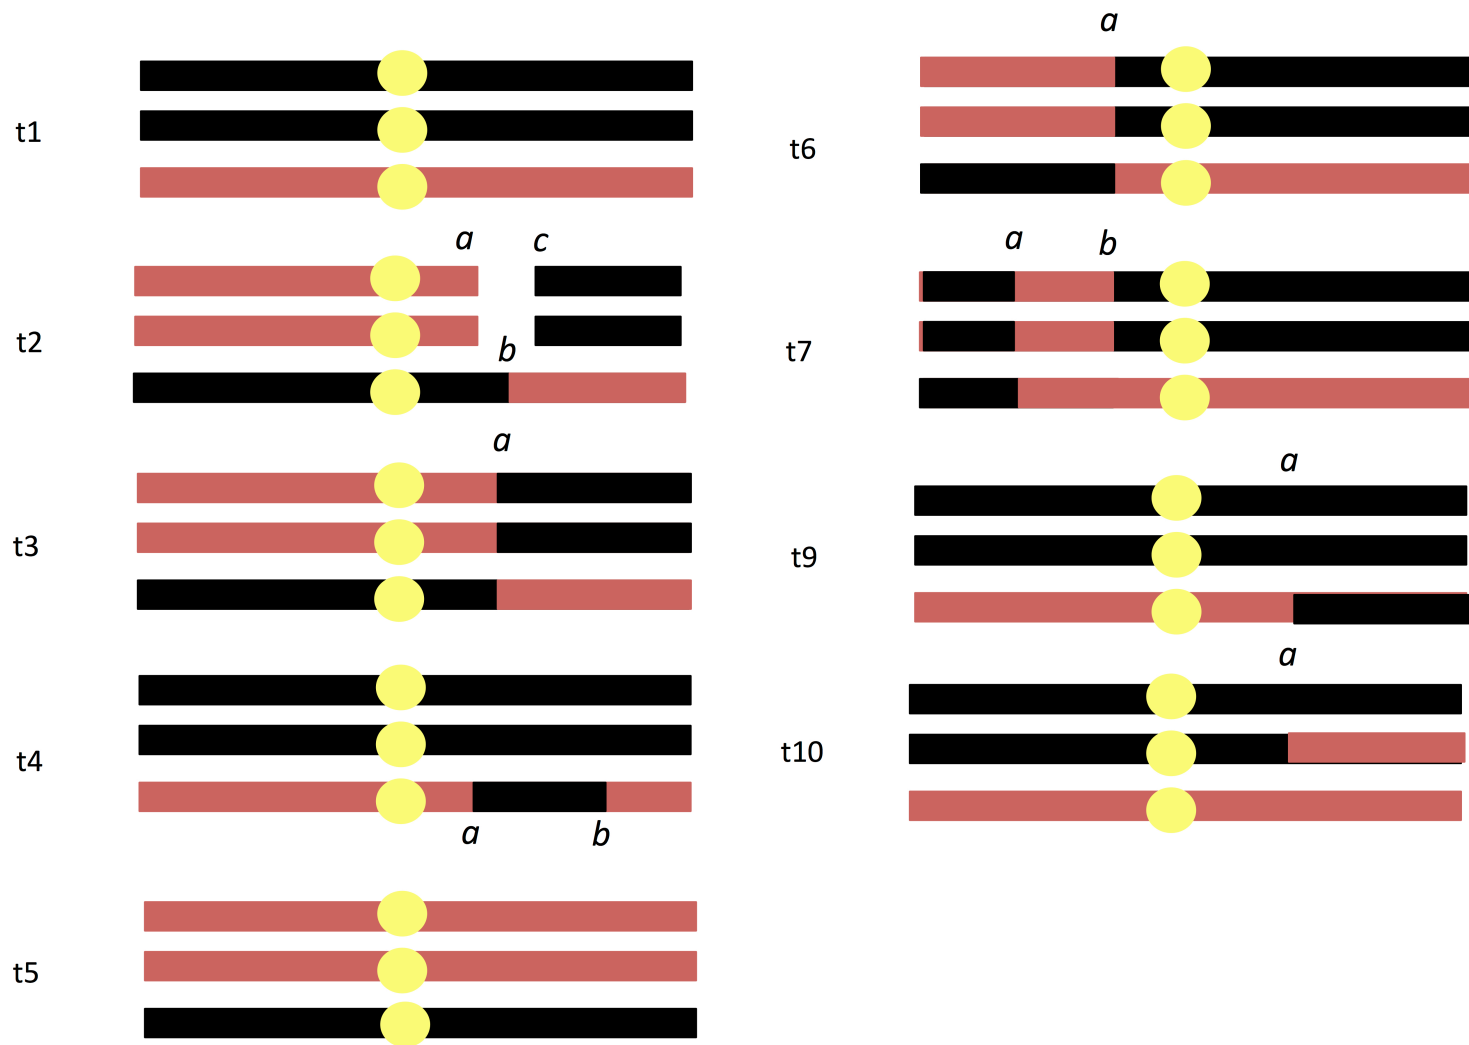

**Figure S3. Aneuploidy events in sub-cultured strains.** Trisomic, but not monosomic, aneuploid events were observed in our studies. For each chromosome, we indicate whether the strain has W303-1A-derived SNPs (red) or YJM789-derived SNPs (black). Note that many of these aneuploid events are associated with recombination on one or more chromosomes.
