# Supplementary material
Source: PubMed Central journal article supplement (PMC4649664)
Supplement: supp_115.182725_FigureS4.pdf [file supp_115.182725_FigureS4.pdf]

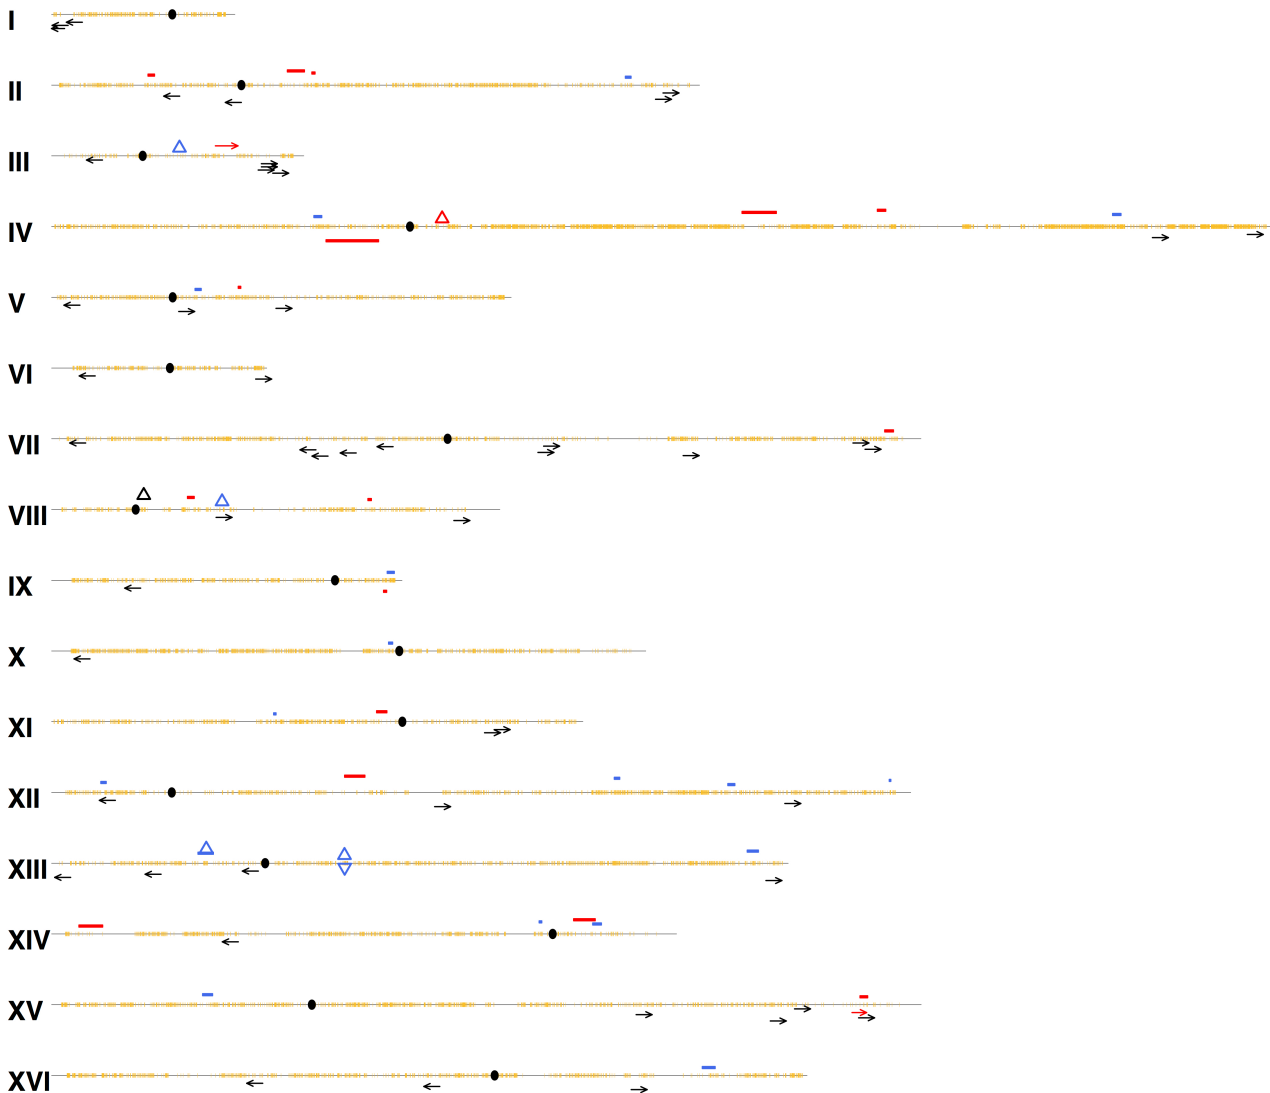

**Figure S4. Locations of LOH events in the sub-cultured *rnh201Δ* strain.** Each of the sixteen chromosomes is shown as a thin black horizontal line with SNPs shown as very short vertical yellow lines. The centromeres are represented by black ovals. Red and blue bars show regions of interstitial LOH in which the W303-1A-derived SNPs became homozygous and the YJM789-derived SNPs became homozygous, respectively. Black arrows indicate the positions of terminal LOH events that were unassociated with a gene conversion event. Red arrows and blue arrows indicate terminal LOH events that were associated with a conversion that made W303-1A-derived SNPs and YJM789-derived SNPs homozygous, respectively. Triangles indicate deletions (red for a deletion of W303-1A-derived sequences and blue for a deletion of YJM789-derived sequences) and inverted triangles indicate duplications (same color code as for deletions).
