# Supplementary material
Source: PubMed Central journal article supplement (PMC4649664)
Supplement: supp_115.182725_FigureS5.pdf [file supp_115.182725_FigureS5.pdf]

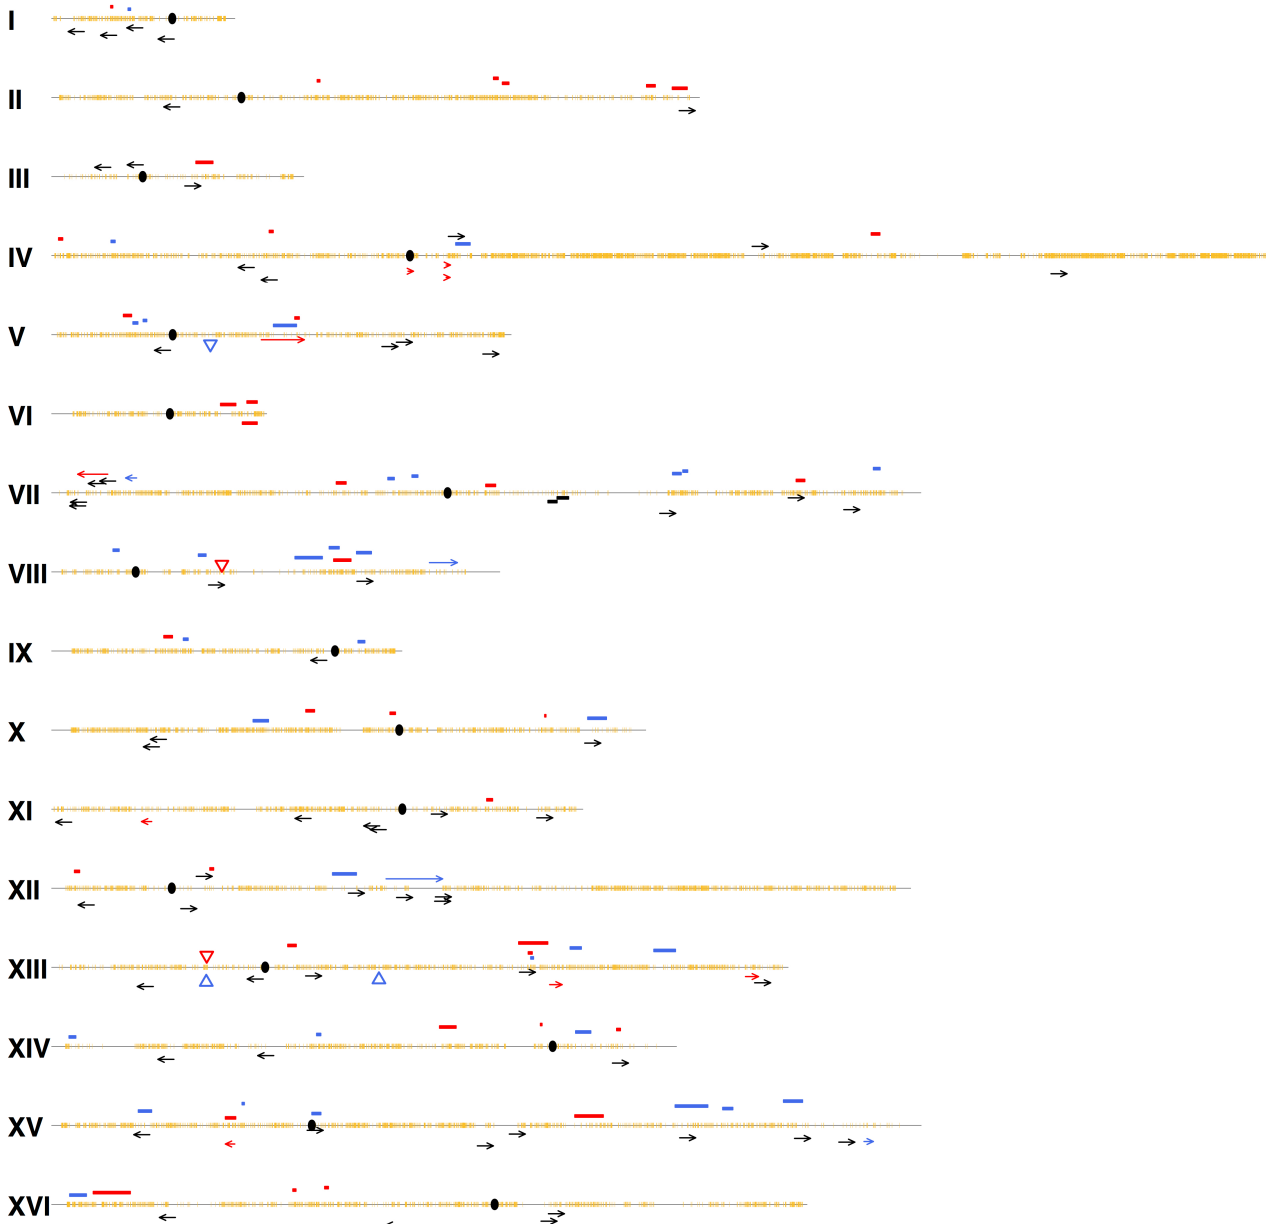

**Figure S5. Location of LOH events in the sub-cultured *rnh1Δ rnh201Δ* strain.** The mapped events are shown with the same code as Fig. S4
