# Supplementary material
Source: PubMed Central journal article supplement (PMC4649664)
Supplement: supp_115.182725_FigureS6.pdf [file supp_115.182725_FigureS6.pdf]

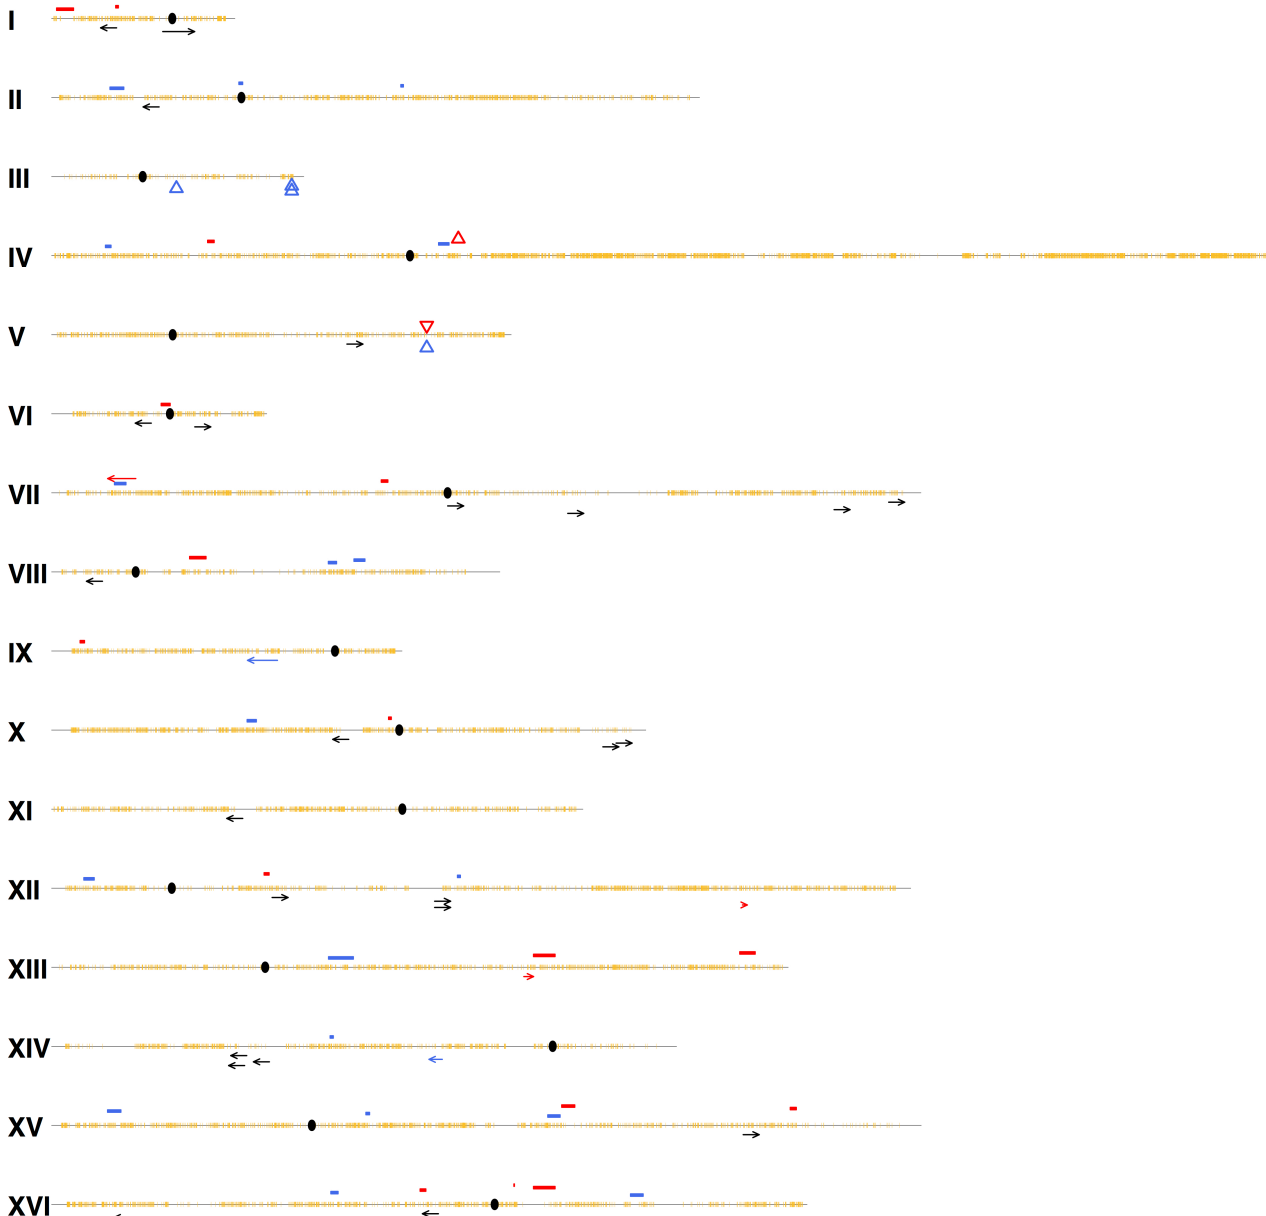

Figure S6. Location of LOH events in the sub-cultured *rnh201Δ pol2-M644L* strain. The mapped events are shown with the same code as in Fig. S4
