# Supplementary material
Source: PubMed Central journal article supplement (PMC4649664)
Supplement: supp_115.182725_FigureS7.pdf [file supp_115.182725_FigureS7.pdf]

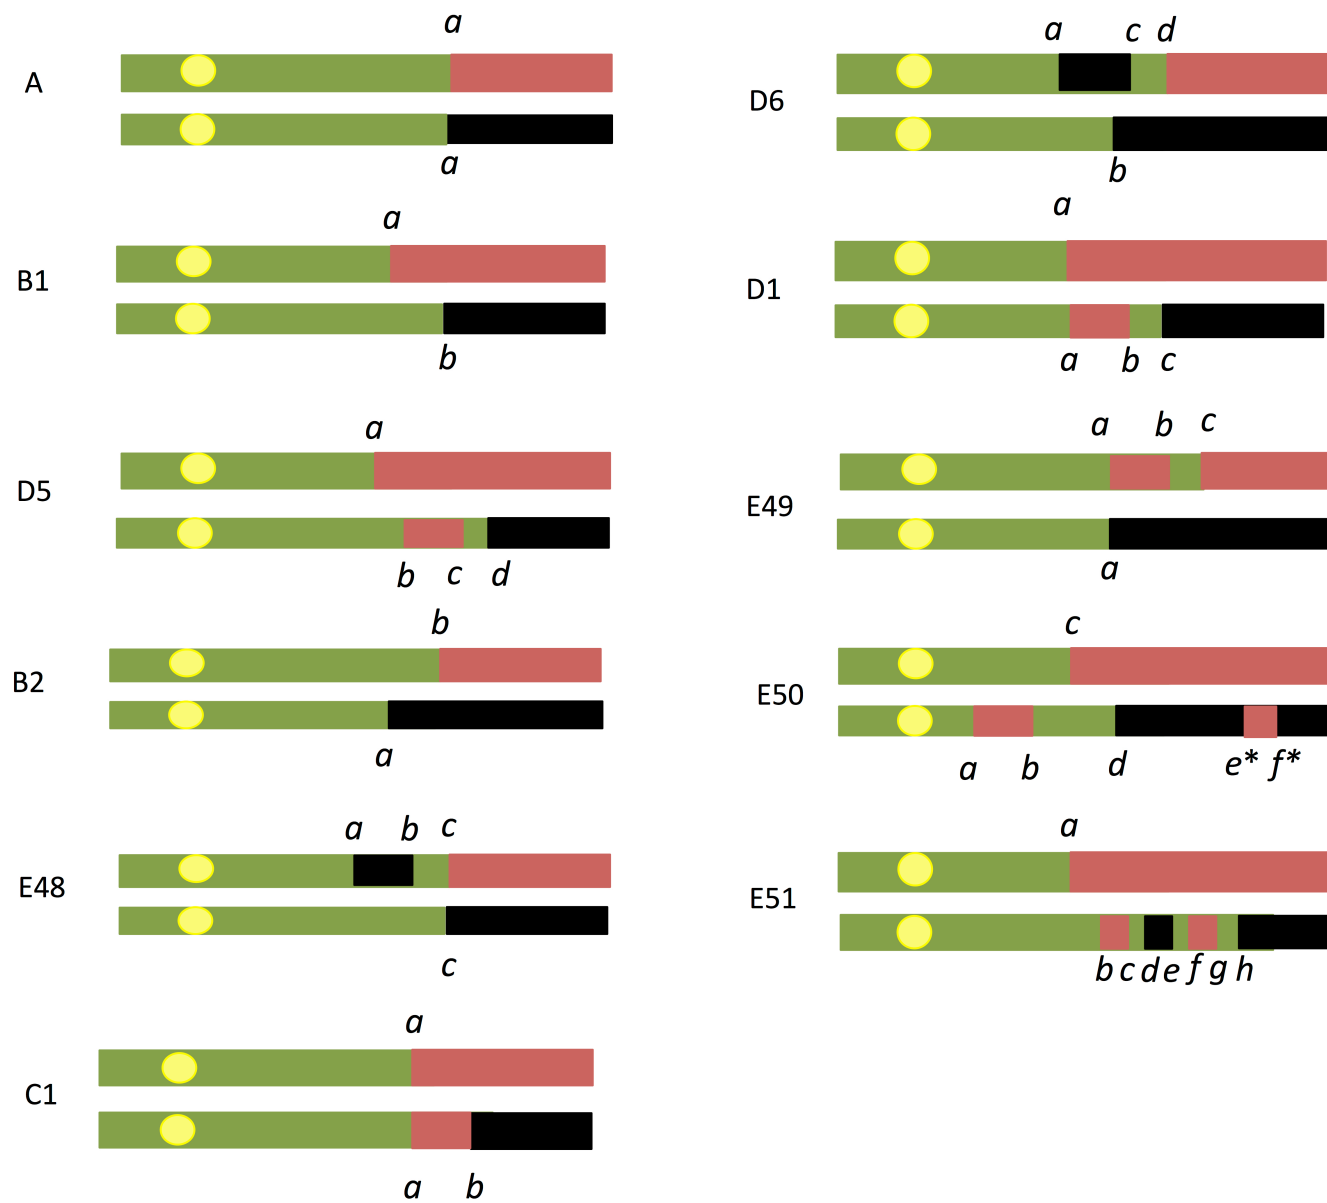

**Figure S7.** Patterns of LOH in sectored colonies. In this depiction, each sectored colony is represented by a pair of lines with the red sector shown as the top line. We use the same color code for heterozygous and homozygous regions as in Fig. S1. Other features of these patterns are described in the main text.
