# Supplementary material
Source: PubMed Central journal article supplement (PMC4649664)
Supplement: supp_115.182725_TableS1.pdf [file supp_115.182725_TableS1.pdf]

**Table S1. Strain list**

| <b>Strain Name</b> | <b>Relevant genotype</b>         | <b>Construction or source</b>                                                                                 | <b>Genotype</b>                                                                                                                                                                                                                                     | <b>Strain background</b> |
|--------------------|----------------------------------|---------------------------------------------------------------------------------------------------------------|-----------------------------------------------------------------------------------------------------------------------------------------------------------------------------------------------------------------------------------------------------|--------------------------|
| S288c              | Wild type                        | Mortimer and Johnston 1986                                                                                    | <i>MAT<math>\alpha</math> SUC2 gal2 mal2 mel flo1 flo8-1 hap1 ho bio1 bio6</i>                                                                                                                                                                      | S288c                    |
| W1588-4c           | Wild type                        | Zhao <i>et al.</i> 1998                                                                                       | <i>MAT<math>\alpha</math> leu2-3,112 his3-11,15 ura3-1 ade2-1 trp1-1 can1-100 RAD5</i>                                                                                                                                                              | W303-1A                  |
| W303-1A            | Wild type                        | Thomas and Rothstein 1989                                                                                     | <i>MAT<math>\alpha</math> leu2-3,112 his3-11,15 ura3-1 ade2-1 trp1-1 can1-100 RAD5</i>                                                                                                                                                              | W303-1A                  |
| SMY710             | Wild type                        | Aksenova <i>et al.</i> 2013                                                                                   | <i>MAT<math>\alpha</math> leu2-<math>\Delta</math>1 trp1-<math>\Delta</math>63 ura3-52 his3-200 ade2<math>\Delta</math>::kanMX</i>                                                                                                                  | S288c                    |
| MV70               | Wild type                        | Vernon <i>et al.</i> 2008                                                                                     | <i>MAT<math>\alpha</math>/MAT<math>\alpha</math> trp1-1/trp1-1 leu2-3,112/leu2-3,112 his3-11,15/his3-11,15 ura3-1/ura3-1 ade2-1/ade2-1 can1-100/CAN1 hom3-10/HOM3 rad5/RAD5 tel1<math>\Delta</math>::kanMX/TEL1 mec1-21/MEC1</i>                    | W303-1A/<br>W303-1A      |
| PG308              | Wild type                        | MV70 transformed with PCR fragment amplified from pAG25 using primers Tel1NatF and Tel1NatR.                  | <i>MAT<math>\alpha</math>/MAT<math>\alpha</math> trp1-1/trp1-1 leu2-3,112/leu2-3,112 his3-11,15/his3-11,15 ura3-1/ura3-1 ade2-1/ade2-1 can1-100/CAN1 hom3-10/HOM3 rad5/RAD5 tel1<math>\Delta</math>::natMX/TEL1 mec1-21/MEC1</i>                    | W303-1A/<br>W303-1A      |
| PG309(2)           | Wild type                        | PG308 transformed with PCR fragment amplified from pFA6-kanMXpGAL(x3HA) using primers MRC1pgalF and MRC1pgalR | <i>MAT<math>\alpha</math>/MAT<math>\alpha</math> trp1-1/trp1-1 leu2-3,112/leu2-3,112 his3-11,15/his3-11,15 ura3-1/ura3-1 ade2-1/ade2-1 can1-100/CAN1 hom3-10/HOM3 rad5/RAD5 tel1<math>\Delta</math>::nat/TEL1 mec1-21/MEC1 MRC1/pGAL-MRC1-kanMX</i> | W303-1A/<br>W303-1A      |
| PG309(2)-4a        | <i>tel1<math>\Delta</math></i>   | Spore from PG309(2)                                                                                           | <i>MAT<math>\alpha</math> RAD5 leu2-3,112 his3-11,15 trp1-1 ade2-1 tel1<math>\Delta</math>::natMX</i>                                                                                                                                               | W303-1A                  |
| JSC19-1            | Wild type                        | St. Charles and Petes 2013                                                                                    | <i>MAT<math>\alpha</math> ade2-1 ura3 gal2 ho::hisG can1<math>\Delta</math>::natMX</i>                                                                                                                                                              | YJM789                   |
| JSC21-1            | Wild type                        | St. Charles and Petes 2013                                                                                    | <i>MAT<math>\alpha</math> ura3 gal2 ho::hisG ade2-1 can1<math>\Delta</math>::natMX IV1510386::SUP4-o</i>                                                                                                                                            | YJM789                   |
| JSC12              | Wild type                        | St. Charles and Petes 2013                                                                                    | <i>MAT<math>\alpha</math> leu2-3,112 his3-11,15 ura3-1 ade2-1 trp1-1 can1<math>\Delta</math>::natMX RAD5 IV1510386::kanMX-can1-100</i>                                                                                                              | W303-1A                  |
| SJR3585            | Wild type                        | Spore from diploid PG309(2)-4a x JSC12                                                                        | <i>MAT<math>\alpha</math> RAD5 leu2-3,112 trp1-1 his3-11,15 ura3-1 ade2-1 IV1510386::kanMX-can1-100</i>                                                                                                                                             | W303-1A                  |
| SJR3615-4          | <i>rnh201<math>\Delta</math></i> | SJR3585 transformed with PCR fragment amplified from pSR955 using primers                                     | <i>MAT<math>\alpha</math> leu2-3,112 his3-11,15 trp1-1 ura3-1 ade2-1 RAD5 rnh201<math>\Delta</math>::loxP-hphMX-loxP IV1510386::kanMX-can1-100</i>                                                                                                  | W303-1A                  |

|            |                                |                                                                                                                 |                                                                                                                                                                                                                                                                              |                |
|------------|--------------------------------|-----------------------------------------------------------------------------------------------------------------|------------------------------------------------------------------------------------------------------------------------------------------------------------------------------------------------------------------------------------------------------------------------------|----------------|
|            |                                | RNH2kanF and RNH2kanR                                                                                           |                                                                                                                                                                                                                                                                              |                |
| SJR3625-9B | <i>rnh1Δ</i><br><i>rnh201Δ</i> | SJR3615-4 transformed with PCR fragment amplified from pSR879 using primers RNH1kanF and RNH1kanR               | <i>MATa leu2-3,112 his3-11,15 trp1-1 ura3-1 ade2-1 RAD5 rnh1Δ::loxP-natMX-loxP rnh201Δ::loxP-hphMX-loxP IV1510386::kanMX-can1-100</i>                                                                                                                                        | W303-1A        |
| SJR3616-3  | <i>rnh201Δ</i>                 | SJR3586 transformed with PCR fragment amplified from pSR955 using primers RNH2kanF and RNH2kanR.                | <i>MATa ura3 gal2 ho::hisG ade2-1 can1Δ::natMX rnh201Δ::loxP-hphMX-loxP IV1510386::SUP4-o</i>                                                                                                                                                                                | YJM789         |
| SJR3626-3  | <i>rnh1Δ</i><br><i>rnh201Δ</i> | SJR3616-3 transformed with PCR fragment amplified from pUG6 using primers RNH1kanF and RNH1kanR                 | <i>MATa ura3 gal2 ho::hisG ade2-1 can1Δ::natMX rnh201Δ::loxP-hph-loxP rnh1Δ::loxP-kanMX-loxP IV1510386::SUP4-o</i>                                                                                                                                                           | YJM789         |
| YJM799     | Wild type                      | John McCusker                                                                                                   | <i>MATa ura3 gal2 ho::hisG</i>                                                                                                                                                                                                                                               | YJM789         |
| YJM790     | Wild type                      | John McCusker                                                                                                   | <i>MATa ho::hisG lys2 gal2</i>                                                                                                                                                                                                                                               | YJM789         |
| KOK3       | Wild type                      | W1588-4c transformed with PCR fragment amplified from pUG6 using primers Forward Sequence and Reverse Sequence. | <i>MATa can1-100 trp1-1 ade2-1 his3-11,15 leu2-3,112 ura3Δ::loxP-kanMX-loxP</i>                                                                                                                                                                                              | W303-1A        |
| KO5        | <i>rnh1Δ</i><br><i>rnh201Δ</i> | SJR3625-9B x SJR3626-3                                                                                          | <i>MATa/MATa ho::hisG/ho::hisG ade2-1/ade2-1 ura3-1/ura3 GAL2/gal2 trp1-1/TRP1 his3-11,15/HIS3 leu2-3,112/LEU2 can1-100/CAN1 rnh201Δ::loxP-hphMX-loxP/rnh201Δ::loxP-hphMX-loxP rnh1Δ::loxP-natMX-loxP/rnh1Δ::loxP-kanMX-loxP IV1510386::kanMX-can1-100/IV1510386::SUP4-o</i> | W303-1A/YJM789 |
| KO30       | Wild type                      | SJR3626-3 x YJM790                                                                                              | <i>MATa/MATa ho::hisG/ho::hisG gal2/gal2 ade2-1/ADE2 URA3/ura3 lys2/LYS2 CAN1/can1Δ::natMX RNH201/rnh201Δ::loxP-hphMX-loxP RNH1/rnh1Δ::loxP-kanMX-loxP IV1510386/IV1510386::SUP4-o</i>                                                                                       | YJM789         |
| KO32       | <i>rnh1Δ</i><br><i>rnh201Δ</i> | Spore from KO30                                                                                                 | <i>MATa can1Δ::natMX ade2-1 ura3 ho::hisG gal2 rnh1::loxP-kanMX-loxP rnh201::loxP-hphMX-loxP</i>                                                                                                                                                                             | YJM789         |
| KO35       | Wild type                      | JSC19-1 transformed with PCR fragment amplified from S288c using primers IVURA3F and IVURA3R.                   | <i>MATa ade2-1 ura3 gal2 ho::hisG can1Δ::nat IV1510386::URA3</i>                                                                                                                                                                                                             | YJM789         |

|       |                                |                                                                                                                   |                                                                                                                                                                                                                      |                     |
|-------|--------------------------------|-------------------------------------------------------------------------------------------------------------------|----------------------------------------------------------------------------------------------------------------------------------------------------------------------------------------------------------------------|---------------------|
| KO36  | Wild type                      | Cre-expressing plasmid pSH47 used to excise the kanMX marker in KOK3                                              | <i>MATa can1-100 trp1-1 ade2-1 his3-11,15 leu2-3,112 ura3Δ::loxP</i>                                                                                                                                                 | W303-1A             |
| KO49  | Wild type                      | KO32 x KO35                                                                                                       | <i>MATa/MATα ade2-1/ade2-1 ura3/ura3 gal2/gal2 ho::hisG/ho::hisG can1Δ::nat/can1Δ::nat rnh1Δ::loxP-kanMX-loxP/RNH1 rnh201Δ::loxP-hphMX-loxP/RNH201 IV1510386/IV1510386::URA3</i>                                     | YJM789/<br>YJM789   |
| KO52  | Wild type                      | SJR3625-9B x W303-1B                                                                                              | <i>MATa/MATα leu2-3,112/leu2-3,112 his3-11,15/his3-11,15 trp1-1/trp1-1 ura3-1/ura3-1 ade2-1/ade2-1 CAN1/can1-100 IV1510386::kanMX-can1-100/IV1510386 rnh1Δ::loxP-natMX-loxP/RNH1 rnh201Δ::loxP-hphMX-loxP/RNH201</i> | W303-1A/<br>W303-1A |
| KO57  | <i>rnh1Δ</i>                   | Spore of KO49                                                                                                     | <i>MATα ade2-1 ura3 gal2 ho::hisG can1Δ::nat IV1510386::URA3 rnh1Δ::loxP-kanMX-loxP</i>                                                                                                                              | YJM789              |
| KO63  | <i>rnh1Δ</i><br><i>rnh201Δ</i> | Spore from KO52                                                                                                   | <i>MATα leu2-3,112 his3-11,15 trp1-1 ura3-1 ade2-1 can1-100 rnh1Δ::loxP-natMX-loxP rnh201Δ::loxP-hphMX-loxP</i>                                                                                                      | W303-1A             |
| KO70  | <i>rnh1Δ</i>                   | Spore of KO52                                                                                                     | <i>MATα leu2-3,112 his3-11,15 trp1-1 ura3-1 ade2-1 can1-100 rnh1Δ::loxP-nat-loxP</i>                                                                                                                                 | W303-1A             |
| KO73  | <i>rnh1Δ</i>                   | KO70 x KO57                                                                                                       | <i>MATa/MATα HO/ho::hisG ade2-1/ade2-1 ura3-1/ura3 GAL2/gal2 trp1-1/TRP1 his3-11,15/HIS3 leu2-3,112/LEU2 can1-100/CAN1 rnh1Δ::loxP-natMX-loxP/rnh1Δ::loxP-kanMX-loxP IV1510386::URA3/IV1510386</i>                   | W303-1A/<br>YJM789  |
| KO75  | <i>rnh201Δ</i>                 | SJR3616-3 x SJR3615-4                                                                                             | <i>MATa/MATα HO/ho::hisG ade2-1/ade2-1 ura3-1/ura3 GAL2/gal2 trp1-1/TRP1 his3-11,15/HIS3 leu2-3,112/LEU2 can1-100/CAN1 rnh201Δ::loxP-hphMX-loxP/rnh201Δ::loxP-hphMX-loxP IV1510386::URA3/IV1510386</i>               | W303-1A/<br>YJM789  |
| KO119 | Wild type                      | YJM799 transformed with transformed with PCR fragment amplified from SMY710 using primers ADE2_XV_F and ADE2_XV_R | <i>MATα ura3 gal2 ho::hisG ade2Δ::kanMX</i>                                                                                                                                                                          | YJM789              |
| KO124 | Wild type                      | KO119 transformed with transformed with PCR fragment amplified from                                               | <i>MATα ade2Δ::kanMX ura3 ho::hisG gal2 IV1495420::ADE2</i>                                                                                                                                                          | YJM789              |

|       |                          |                                                                                                                 |                                                                                                                                                                                                                                                                                   |                     |
|-------|--------------------------|-----------------------------------------------------------------------------------------------------------------|-----------------------------------------------------------------------------------------------------------------------------------------------------------------------------------------------------------------------------------------------------------------------------------|---------------------|
|       |                          | S288c using primers IVADE2_3_F and IVADE2_3_R                                                                   |                                                                                                                                                                                                                                                                                   |                     |
| KO125 | Wild type                | KO124 x KO32                                                                                                    | <i>MATa/MATα can1Δ::natMX/CAN1 ade2-1/ade2Δ::kanMX ura3/ura3 ho::hisG/ho::hisG gal2/gal2 rnh1Δ::loxP-kanMX-loxP/RNH1 rnh201Δ::loxP-hphMX-loxP/RNH201 IV1495420/IV1495420::ADE2</i>                                                                                                | YJM789/<br>YJM789   |
| KO127 | <i>rnh1Δ<br/>rnh201Δ</i> | Spore from KO125                                                                                                | <i>MATα ade2-1 ura3 ho::hisG gal2 can1Δ::natMX rnh1Δ::loxP-kanMX-loxP rnh201Δ::loxP-hphMX-loxP IV1495420::ADE2</i>                                                                                                                                                                | YJM789              |
| KO128 | <i>rnh1Δ</i>             | Spore from KO125                                                                                                | <i>MATα ade2-1 ura3 ho::hisG gal2 can1Δ::natMX rnh1Δ::loxP-kanMX-loxP IV1495420::ADE2</i>                                                                                                                                                                                         | YJM789              |
| KO131 | <i>rnh201Δ</i>           | Spore from KO125                                                                                                | <i>MATα ade2-1 ura3 ho::hisG gal2 rnh201Δ::loxP-hphMX-loxP IV1495420::ADE2</i>                                                                                                                                                                                                    | YJM789              |
| KO132 | <i>rnh1Δ<br/>rnh201Δ</i> | KO127 x SJR3625-9B                                                                                              | <i>MATa/MATα leu2-3,112/LEU2 his3-11,15/HIS3 trp1-1/TRP1 ura3-1/ura3 ade2-1/ade2-1 rnh1Δ::loxP-natMX-loxP /rnh1Δ::loxP-kanMX-loxP rnh201Δ::loxP-hphMX-loxP/rnh201Δ::loxP-hphMX-loxP ho::hisG/ho::hisG GAL2/gal2 IV1510386::kanMX-can1-100/IV1510386 IV1495420/IV1495420::ADE2</i> | W303-1A/<br>YJM789  |
| KO135 | <i>rnh201Δ</i>           | KO130 x SJR3615-4                                                                                               | <i>MATa/MATα leu2-3,112/LEU2 his3-11,15/HIS3 trp1-1/TRP1 ura3-1/ura3 HO/ho::hisG ade2-1/ade2-1 GAL2/gal2 CAN1/can1Δ::natMX IV1510386::kanMX-can1-100/IV1510386 rnh201Δ::loxP-hphMX-loxP/rnh201Δ::loxP-hphMX-loxP IV1495420/IV1495420::ADE2</i>                                    | W303-1A/<br>YJM789  |
| KO171 | Wild type                | KOK3 transformed with transformed with PCR fragment amplified from pUG72 using primers KL_URA3_F and KL_URA3_R. | <i>MATa can1-100 trp1-1 ade2-1 his3-11,15 leu2-3,112 ura3Δ::loxP-kanMX-loxP IV1495420::loxP-URA3KI-loxP</i>                                                                                                                                                                       | W303-1A             |
| KO172 | Wild type                | KO171 x KO63                                                                                                    | <i>MATa/MATα can1-100/can1-100 trp1-1/trp1-1 ade2-1/ade2-1 leu2-3,112/leu2-3,112 his3-11,15/his3-11,15 ura3Δ::loxP-kanMX-loxP/ura3-1 RNH201/rnh201Δ::loxP-hphMX-loxP RNH1/rnh1Δ::loxP-natMX-loxP IV1495420::loxP-URA3KI-loxP/IV1495420</i>                                        | W303-1A/<br>W303-1A |

|       |                                |                                                                                                                   |                                                                                                                                                                                                                                                                        |                     |
|-------|--------------------------------|-------------------------------------------------------------------------------------------------------------------|------------------------------------------------------------------------------------------------------------------------------------------------------------------------------------------------------------------------------------------------------------------------|---------------------|
| KO175 | <i>rnh1Δ</i><br><i>rnh201Δ</i> | Spore from KO172                                                                                                  | <i>MATa can1-100 trp1-1 ade2-1 ura3-1 leu2-3,112 his3-11,15 rnh201Δ::loxP-hph-loxP rnh1Δ::loxP-natMX-loxP IV1495420::loxP-URA3KI-loxP</i>                                                                                                                              | W303-1A             |
| KO176 | <i>rnh1Δ</i><br><i>rnh201Δ</i> | Spore from KO172                                                                                                  | <i>MATα can1-100 trp1-1 ade2-1 leu2-3,112 his3-11,15 ura3-1 rnh201Δ::loxP-hphMX-loxP rnh1Δ::loxP-natMX-loxP IV1495420::loxP-URA3KI-loxP</i>                                                                                                                            | W303-1A             |
| KO179 | <i>rnh201Δ</i>                 | Spore from KO172                                                                                                  | <i>MATa can1-100 trp1-1 ade2-1 ura3-1 leu2-3,112 his3-11,15 rnh201Δ::loxP-hph-loxP IV1495420::loxP-URA3KI-loxP</i>                                                                                                                                                     | W303-1A             |
| KO185 | <i>rnh1Δ</i>                   | Spore from KO172                                                                                                  | <i>MATa can1-100 trp1-1 ade2-1 ura3-1 leu2-3,112 his3-11,15 rnh1Δ::loxP-natMX-loxP IV1495420::loxP-URA3KI-loxP</i>                                                                                                                                                     | W303-1A             |
| KO187 | <i>rnh1Δ</i>                   | KO185 x KO128                                                                                                     | <i>MATa/MATα HO/ho::hisG ade2-1/ade2-1 ura3-1/ura3 GAL2/gal2 trp1-1/TRP1 his3-11,15/HIS3 leu2-3,112/LEU2 can1-100/can1Δ::natMX rnh1Δ::loxP-natMX-loxP/rnh1Δ::loxP-kanMX-loxP IV1495420::loxP-URA3KI-loxP/IV1495420::ADE2</i>                                           | W303-1A/<br>YJM789  |
| KO188 | <i>rnh201Δ</i>                 | KO179 x KO131                                                                                                     | <i>MATa/MATα HO/ho::hisG ade2-1/ade2-1 ura3-1/ura3 GAL2/gal2 trp1-1/TRP1 his3-11,15/HIS3 leu2-3,112/LEU2 can1-100/can1Δ::natMX rnh201Δ::loxP-natMX-loxP/rnh201Δ::loxP-kanMX-loxP IV1495420::loxP-URA3KI-loxP/IV1495420::ADE2</i>                                       | W303-1A/<br>YJM789  |
| KO189 | <i>rnh1Δ</i><br><i>rnh201Δ</i> | KO175 x KO127                                                                                                     | <i>MATa/MATα HO/ho::hisG ade2-1/ade2-1 ura3-1/ura3 GAL2/gal2 trp1-1/TRP1 his3-11,15/HIS3 leu2-3,112/LEU2 can1-100/CAN1 rnh201Δ::loxP-hphMX-loxP/rnh201Δ::loxP-hphMX-loxP rnh1Δ::loxP-natMX-loxP/rnh1Δ::loxP-kanMX-loxP IV1495420::loxP-URA3KI-loxP/IV1495420::ADE2</i> | W303-1A/<br>YJM789  |
| KO198 | Wild type                      | KO171 x KO124                                                                                                     | <i>MATa/MATα HO/ho::hisG ade2-1/ade2Δ::kanMX ura3Δ::loxP-kanMX-loxP/ura3 GAL2/gal2 trp1-1/TRP1 his3-11,15/HIS3 leu2-3,112/LEU2 can1-100/CAN1 IV1495420::loxP-URA3KI-loxP/IV1495420::ADE2</i>                                                                           | W303-1A/<br>YJM789  |
| KO200 | <i>pol2-M644L</i>              | <i>pol2-M644L</i> introduced into KO36 by two-step allele replacement using Agel-digested p173- <i>pol2-M644L</i> | <i>MATa can1-100 trp1-1 ade2-1 his3-11,15 leu2-3,112 ura3Δ::loxP pol2-M644L</i>                                                                                                                                                                                        | W303-1A             |
| KO201 | Wild type                      | KO200 x KO176                                                                                                     | <i>MATa/MATα can1-100/can1-100 trp1-1/trp1-1 ade2-1/ade2-1 his3-11,15/his3-11,15 leu2-3,112/leu2-3,112</i>                                                                                                                                                             | W303-1A/<br>W303-1A |

|       |                              |                                                                                                                            |                                                                                                                                                                                                                                                        |                    |
|-------|------------------------------|----------------------------------------------------------------------------------------------------------------------------|--------------------------------------------------------------------------------------------------------------------------------------------------------------------------------------------------------------------------------------------------------|--------------------|
|       |                              |                                                                                                                            | <i>ura3Δ::loxP/ura3-1 pol2-M644L/POL2 RNH1/rnh1Δ::loxP-natMX-loxP rnh201Δ::loxP-hphMX-loxP/RNH201 IV1495420/IV1495420::ADE2</i>                                                                                                                        |                    |
| KO204 | <i>rnh201Δ pol2-M644L</i>    | Spore from KO201                                                                                                           | <i>MATa can1-100 trp1-1 ade2-1 his3-11,15 leu2-3,112 ura3-1 pol2-M644L rnh201Δ::loxP-hphMX-loxP IV1495420::loxP-URA3K.L-loxP</i>                                                                                                                       | W303-1A            |
| KO207 | <i>rnh201Δ pol2-M644L</i>    | <i>pol2-M644L</i> introduced into KO131 by two-step allele replacement using <i>Agel</i> -digested p173- <i>pol2-M644L</i> | <i>MATa ade2-1 can1Δ::natMX ura3 ho::hisG gal2 pol2-M644L rnh201Δ::loxP-hphMX-loxP IV1495420::ADE2</i>                                                                                                                                                 | YJM789             |
| KO213 | <i>pol2-M644L</i>            | KO124 after two-step transplacement using <i>Agel</i> -digested p173- <i>pol2-M644L</i>                                    | <i>MATa ade2Δ::kanMX ura3 ho::hisG gal2 IV1495420::ADE2 pol2-M644L</i>                                                                                                                                                                                 | YJM789             |
| KO214 | Wild type                    | KO207 x KO32                                                                                                               | <i>MATa/MATa can1Δ::natMX/CAN1 ade2-1/ade2-1 ura3/ura3 ho::hisG/ho::hisG gal2/gal2 rnh1Δ::loxP-kanMX-loxP/RNH1 rnh201Δ::loxP-hphMX-loxP/RNH201 POL2/pol2M644L IV1495420/IV1495420::ADE2</i>                                                            | YJM789/<br>YJM789  |
| KO218 | <i>rnh201Δ pol2-M644L</i>    | Spore from KO214                                                                                                           | <i>MATa ade2-1 ura3 gal2 ho::hisG pol2-M644L can1::ΔnatMX rnh201Δ::loxP-hphMX-loxP IV1495420::ADE2</i>                                                                                                                                                 | YJM789             |
| KO234 | <i>pol2-M644L/pol2-M644L</i> | KO213 x KO200                                                                                                              | <i>MATa/MATa HO/ho::hisG ade2-1/ade2-1 ura3-1/ura3 GAL2/gal2 trp1-1/TRP1 his3-11,15/HIS3 leu2-3,112/LEU2 can1-100/CAN1 pol2-M644L/pol2-M644L IV1495420::loxP-URA3KI-loxP/IV1495420::ADE2</i>                                                           | W303-1A/<br>YJM789 |
| KO244 | <i>rnh201Δ pol2-M644L</i>    | KO218 x KO204                                                                                                              | <i>MATa/MATa HO/ho::hisG ade2-1/ade2-1 ura3-1/ura3 GAL2/gal2 trp1-1/TRP1 his3-11,15/HIS3 leu2-3,112/LEU2 can1-100/can1Δ::natMX rnh201Δ::loxP-hphMX-loxP/rnh201Δ::loxP-hphMX-loxP pol2-M644L/pol2-M644L IV1495420::loxP-URA3KI-loxP/IV1495420::ADE2</i> | W303-1A/<br>YJM789 |
