# Supplementary material
Source: PubMed Central journal article supplement (PMC4649664)
Supplement: supp_115.182725_TableS2.pdf [file supp_115.182725_TableS2.pdf]

**Table S2. Plasmid list**

| <b>Plasmid</b>       | <b>Relevant feature</b>    | <b>Source</b>                     | <b>Strains constructed</b> |
|----------------------|----------------------------|-----------------------------------|----------------------------|
| pFA6-kanMXpGAL(x3HA) | <i>kanMX-pGAL</i> cassette | Longtine <i>et al.</i> 1998       | PG309(2)                   |
| p173-pol2-M644L      | <i>pol2-M644L</i> allele   | Nick McElhinny <i>et al.</i> 2010 | KO200, KO207, KO213        |
| pAG25                | <i>natMX</i>               | Goldstein and McCusker 1999       | PG308                      |
| pSH47                | <i>pGAL1-Cre</i>           | Gueldener <i>et al.</i> 2002      | KO36                       |
| pUG72                | <i>loxP-URA3KI-loxP</i>    | Gueldener <i>et al.</i> 2002      | KO171                      |
| pSR879               | <i>loxP-natMX-loxP</i>     | Kim <i>et al.</i> 2013            | SJR3625-9B                 |
| pSR955               | <i>loxP-hphMX-loxP</i>     | Kim <i>et al.</i> 2013            | SJR3615-4, SJR3616-3       |
| pUG6                 | <i>loxP-kanMX-loxP</i>     | Gueldener <i>et al.</i> 2002      | SJR3626-3, KOK3            |
