# Supplementary material
Source: PubMed Central journal article supplement (PMC4649664)
Supplement: supp_115.182725_TableS3.pdf [file supp_115.182725_TableS3.pdf]

**Table S3. Primers list**

| <b>Primer</b>       | <b>Sequence (5' to 3')</b>                                                                       | <b>Strains constructed (purpose)</b>                           |
|---------------------|--------------------------------------------------------------------------------------------------|----------------------------------------------------------------|
| RNH1KANF            | ATGGCAAGGCAAGGGAACCTTCTACGCGTTAGAAAGGGCAGGGAAA<br>CTGGGATCTATAATCAGCTGAAGCTTCGTACG               | SJR2626-3, SJR3625-9B<br>(construct <i>RNH1</i> deletion)      |
| RNH1KANR            | GCATTATCGTCTAGATGCTCCTTTCTTCGCCAGAAAATCTGCCATTTT<br>ATTTCTGGATCAGGCCACTAGTGGATCTG                | SJR2626-3, SJR3625-9B<br>(construct <i>RNH1</i> deletion)      |
| RNH1UPF             | TGGCAGCACAAATAATACACG                                                                            | KO127, KO128, SJR3626-3,<br>SJR3625-9b (confirm <i>rnh1</i> Δ) |
| RNH1DWR             | CACGCTTATAGATAGTTATCG                                                                            | KO127, KO128, SJR3626-3,<br>SJR3625-9b (confirm <i>rnh1</i> Δ) |
| RNH2KANF            | CTAATGAGAGTGTGCGAAAACCTTGAAAACAACACTACTGCACACCAAAT<br>TGATACGATTAACAGCTGAAGCTTCGTACG             | SJR3615-4, SJR3616-3<br>( <i>RNH201</i> deletion)              |
| RNH2KANR            | GCTTCACGGATAGTAGAAACGGCAAAGCATAGTAGCAGATGACTTGT<br>ATGAGTTATTGAAAGGCCACTAGTGGATCTG               | SJR3615-4, SJR3616-3<br>( <i>RNH201</i> deletion)              |
| RNH2UPF             | TTGCGACGCCTGCCAATGC                                                                              | SJR3615-4, SJR3616-3<br>(confirm <i>rnh201</i> Δ)              |
| RNH2DWR             | TCGTTCCGGTTGGTTGTCTC                                                                             | SJR3615-4, SJR3616-3<br>(confirm <i>rnh201</i> Δ)              |
| KL_URA3_F           | CGGGTAGAATCAATGCAATCAGTGGTAATTATCTAGATGACGTCCTTT<br>ATGACCTTGACACCCCTGCAGCTGAAGCTTCGTACG         | KO171 (insertion of <i>URA3KI</i> at end of<br>chr. IV)        |
| KL_URA3_R           | TGTGGTGACAACCTAACCCCTTCGTTGATACTAGTTTGAAGTTATCA<br>ATATCCTGAATTAGAGTTGTGGAGGCCACTAGTGGATCTG      | KO171 (insertion of <i>URA3KI</i> at end of<br>chr. IV)        |
| IVADE2_3_F          | CGGGTAGAATCAATGCAATCAGTGGTAATTATCTAGATGACGTCCTTT<br>ATGACCTTGACACCCCTGGTTGAGAAGCCGAGAATTTTGTGTA  | KO124 (insertion of <i>ADE2</i> at end of<br>chr. IV)          |
| IVADE2_3_R          | TGTGGTGACAACCTAACCCCTTCGTTGATACTAGTTTGAAGTTATCA<br>ATATCCTGAATTAGAGTTGTGGTCCTCGTTTCTGCATTGAG     | KO124 (insertion of <i>ADE2</i> at end of<br>chr. IV)          |
| IVURA3F             | GCTTTACAGGACCTATTTTTCATACGTTATGCACTTCATTCTTTTTGTC<br>GGTTTGATAACCAGCAGAATCTAACGCTAGAGCAGACGCTCAT | KO35 (insertion of <i>URA3</i> at end of<br>chr. IV)           |
| IVURA3R             | AAGCGCTGCTGCGTTTTTCGAGGTATGGCTTCTGCCGGGCTAACGTTT<br>AAATTAAGGAACAGATTCCCGGGTAATAACTGA            | KO35 (insertion of <i>URA3</i> at end of<br>chr. IV)           |
| EXT1510386F         | CATTGGAGCGAATGATGACG                                                                             | KO35 (confirmation of <i>URA3</i> insertion<br>on chr. IV)     |
| EXT1510386R         | TGTGCAATCGTTGTCAAGTTGG                                                                           | KO35 (confirmation of <i>URA3</i> insertion<br>on chr. IV)     |
| Forward<br>Sequence | TGCCAGTATTCTTAACCCAACTGCACAGAACAAAACCTGCAGGAA<br>ACGAAGATAAATCCAGCTGAAGCTTCGTACG                 | KOK3 (deletion of <i>URA3</i> locus)                           |
| Reverse             | TTAAATTGAAGCTCTAATTTGTGAGTTTAGTATACATGCATTTACTTAT                                                | KOK3 (deletion of <i>URA3</i> locus)                           |

|              |                                                                        |                                                                                                                                                 |
|--------------|------------------------------------------------------------------------|-------------------------------------------------------------------------------------------------------------------------------------------------|
| Sequence     | AATACAGTTTTAGGCCACTAGTGGATCTG                                          |                                                                                                                                                 |
| ADE2_XV_R    | GGTGCGTAAAATCGTTGGAT                                                   | KO119, KO127, KO128 (to insert <i>ade2Δ::kanMX</i> in KO119 and to determine whether KO127 and KO128 had <i>ade2-1</i> or <i>ade2Δ::kanMX</i> ) |
| ADE2_XV_F    | ATCCTCGGTTCTGCATTGAG                                                   | KO119, KO127, KO128 (to insert <i>ade2Δ::kanMX</i> in KO119 and to determine whether KO127 and KO128 had <i>ade2-1</i> or <i>ade2Δ::kanMX</i> ) |
| Pol2DigestF1 | GAAAAGCCACAGCACCTTTC                                                   | KO200, KO207, spores of KO214 and KO201 (confirmation of <i>pol2-M644L</i> )                                                                    |
| Pol2DigestR1 | TTGGACAGATTTCCCTTCCA                                                   | KO200, KO207, spores of KO214 and KO201 (confirmation of <i>pol2-M644L</i> )                                                                    |
| MATaF        | ACTCCACTTCAAGTAAGAGTTTG                                                | Many strains (diagnosis of mating type)                                                                                                         |
| MATalphaF    | GCACGGAATATGGGACTACTTCG                                                | Many strains (diagnosis of mating type)                                                                                                         |
| MATR         | AGTCACATCAAGATCGTTTATGG                                                | Many strains (diagnosis of mating type)                                                                                                         |
| extF3        | AATGCGGGTAGAATCAATGC                                                   | KO124, KO171 (confirmation of <i>ADE2</i> or <i>URA3KI</i> insertion on chr. IV)                                                                |
| extR3        | AGGTGATGGGAAATCGAGTG                                                   | KO124, KO171 (confirmation of <i>ADE2</i> or <i>URA3KI</i> insertion on chr. IV)                                                                |
| KANF222      | AATTTATGCCTCTTCCGACC                                                   | KOK3 (confirmation of <i>URA3</i> deletion)                                                                                                     |
| URAR1128     | GAAATCATTACGACCG                                                       | KOK3 (confirmation of <i>URA3</i> deletion)                                                                                                     |
| Tel1NATF     | ATTCGAAAAAAAAAGCCTTCAAAGAAAAGGGAAATCAGTGTAACATAGACGCGTACGCTGCAGGTCGAC  | PG308 (replacement of <i>tel1::kanMX</i> with <i>tel1::natMX</i> )                                                                              |
| Tel1NATR     | TTCGTATTTCTATAAACAAAAAAAAAGAAGTATAAAGCATCTGCATAGCAAATCGATGAATTCGAGCTCG | PG308 (replacement of <i>tel1::kanMX</i> with <i>tel1::natMX</i> )                                                                              |
| MRC1pgalF    | GGAAGTTCGTTATTCGCTTTTGAAGTATCACCAAATATTGAATTCGAGCTCGTTTAAAC            | PG309(2) (to insert the <i>GAL1</i> promoter and <i>kanMX</i> upstream of <i>MRC1</i> )                                                         |
| MRC1pgalR    | TTGCAGTCAACGAGGACAAAGCATGCAAGGCATCATCCATGCACTGAGCAGCGTAATCTG           | PG309(2) (to insert the <i>GAL1</i> promoter and <i>kanMX</i> upstream of <i>MRC1</i> )                                                         |
