# Supplementary material
Source: PubMed Central journal article supplement (PMC4649664)
Supplement: supp_115.182725_TableS4.pdf [file supp_115.182725_TableS4.pdf]

**Table S4. Strains used in different assays of LOH**

| <b>Genotype</b>                   | <b>Sub-culturing</b> | <b>Sectoring assay</b> | <b>RCO mapping in sectored colonies</b> | <b>Rate of 5FOA resistance</b> |
|-----------------------------------|----------------------|------------------------|-----------------------------------------|--------------------------------|
| wild-type                         | KO198                | KO198                  | KO198                                   | KO198                          |
| <i>rnh1</i> Δ                     | KO73                 | KO187                  | KO187                                   | KO187                          |
| <i>pol2-M644L</i>                 | KO234                | KO234                  | KO234                                   | KO234                          |
| <i>rnh201</i> Δ                   | KO75                 | KO188                  | KO188 and KO135                         | KO188                          |
| <i>rnh201</i> Δ <i>pol2-M644L</i> | KO244                | KO244                  | KO244                                   | KO244                          |
| <i>rnh1</i> Δ <i>rnh201</i> Δ     | KO5                  | KO189                  | KO132                                   | KO189                          |
