# Supplementary material
Source: PubMed Central journal article supplement (PMC4649664)
Supplement: supp_115.182725_TableS9.pdf [file supp_115.182725_TableS9.pdf]

**Table S9. References used to determine locations of genomic elements.<sup>1</sup>**

| <b>Genomic elements</b>                                                            | <b>Data source</b>            |
|------------------------------------------------------------------------------------|-------------------------------|
| Ty element                                                                         | SGD; YeastMine                |
| Solo LTR                                                                           | SGD; YeastMine                |
| Centromeres                                                                        | SGD; YeastMine                |
| Intron-containing genes                                                            | SGD; YeastMine                |
| ARS elements                                                                       | SGD; YeastMine                |
| tRNA genes                                                                         | SGD; YeastMine                |
| Long genes                                                                         | SGD; YeastMine                |
| Regions of high transcription                                                      | SGD; YeastMine                |
| Regions of low transcription                                                       | SGD; YeastMine                |
| ORFs with high GC content                                                          | SGD; YeastMine                |
| High G content on the non-transcribed strand                                       | SGD; YeastMine                |
| Sites of Rbp3 accumulation in S phase                                              | Fachinetti <i>et al.</i> 2010 |
| TER sites                                                                          | Fachinetti <i>et al.</i> 2010 |
| TER sites related to high transcription                                            | Fachinetti <i>et al.</i> 2010 |
| Sites of Rrm3 accumulation                                                         | Azvolinsky <i>et al.</i> 2009 |
| Palindromic sequences                                                              | Lisnic <i>et al.</i> 2005     |
| Sites of G4 quadruplex formation (predicted by sequence context <i>in silico</i> ) | Capra <i>et al.</i> 2010      |
| Sites of differential transcription in response to NMM <sup>2</sup>                | Hershman <i>et al.</i> 2008   |
| Regions of transcription-transcription conflicts resolved by Elc1p <sup>3</sup>    | Hobson <i>et al.</i> 2012     |
| Tracts of poly A or poly T $\geq$ 25 bp                                            | SGD                           |
| Sites of RNA/DNA hybrid accumulation in <i>rh1 rh201</i>                           | Chan <i>et al.</i> 2014       |

<sup>1</sup>Most of the genomic elements were identified in Saccharomyces Genome Database (SGD) using the YeastMine tool (described: <http://www.yeastgenome.org/help/video-tutorials/yeastmine>). The criteria used to determine the number each elements in the genome are described in File S1. We chose to identify tracts of poly A or poly T > 25 bp based on a personal communication from Doug Koshland (University of California, Berkeley) who found an association between such tracts and the locations of R-loops.

<sup>2</sup>NMM is an abbreviation for N-methyl mesoporphyrin IX, a drug that binds G4 quadruplex structures.

<sup>3</sup>Elc1p is a protein required to remove stalled RNA polymerase II complexes (Hobson *et al.*, 2012).
