# Supplementary material
Source: PubMed Central journal article supplement (PMC4649664)
Supplement: supp_115.182725_TableS10.pdf [file supp_115.182725_TableS10.pdf]

**Table S10. Number of genomic elements represented on the microarrays**

| <b>Element</b>                                                                     | <b># elements per genome</b> | <b># elements on whole-genome array<sup>1</sup></b> | <b># elements in <i>rnh201Δ</i><sup>2</sup></b> | <b># elements in <i>rnh201Δ pol2-M644L</i><sup>2</sup></b> | <b># elements in <i>rnh1Δ rnh201Δ</i><sup>2</sup></b> | <b># elements on chromosome IV array<sup>3</sup></b> |
|------------------------------------------------------------------------------------|------------------------------|-----------------------------------------------------|-------------------------------------------------|------------------------------------------------------------|-------------------------------------------------------|------------------------------------------------------|
| Ty elements                                                                        | 50                           | 48                                                  | 48                                              | 48                                                         | 35                                                    | 8                                                    |
| Solo LTRs                                                                          | 291                          | 280                                                 | 280                                             | 276                                                        | 246                                                   | 19                                                   |
| Centromeres                                                                        | 16                           | 16                                                  | 16                                              | 16                                                         | 16                                                    | 1                                                    |
| Intron-containing genes                                                            | 345                          | 331                                                 | 331                                             | 323                                                        | 287                                                   | 24                                                   |
| ARS elements                                                                       | 352                          | 317                                                 | 317                                             | 308                                                        | 275                                                   | 28                                                   |
| tRNA genes                                                                         | 275                          | 274                                                 | 274                                             | 270                                                        | 236                                                   | 23                                                   |
| Long genes                                                                         | 306                          | 306                                                 | 306                                             | 295                                                        | 259                                                   | 28                                                   |
| Regions of high transcription                                                      | 330                          | 329                                                 | 329                                             | 318                                                        | 270                                                   | 36                                                   |
| Regions of low transcription                                                       | 328                          | 312                                                 | 312                                             | 303                                                        | 272                                                   | 20                                                   |
| ORFs with high GC content                                                          | 115                          | 115                                                 | 115                                             | 114                                                        | 96                                                    | 8                                                    |
| High G content on the non-transcribed strand                                       | 41                           | 41                                                  | 41                                              | 40                                                         | 34                                                    | 1                                                    |
| Sites of Rbp3 accumulation in S phase                                              | 93                           | 93                                                  | 93                                              | 93                                                         | 70                                                    | 11                                                   |
| TER sites                                                                          | 71                           | 71                                                  | 71                                              | 69                                                         | 69                                                    | 3                                                    |
| TER sites related to high transcription                                            | 58                           | 58                                                  | 58                                              | 56                                                         | 56                                                    | 3                                                    |
| Sites of Rrm3 accumulation                                                         | 115                          | 112                                                 | 112                                             | 112                                                        | 103                                                   | 6                                                    |
| Palindromic sequences                                                              | 611                          | 589                                                 | 589                                             | 573                                                        | 517                                                   | 51                                                   |
| Sites of G4 quadruplex formation (predicted by sequence context <i>in silico</i> ) | 636                          | 543                                                 | 543                                             | 536                                                        | 480                                                   | 20                                                   |
| Sites of differential transcription in response to NMM                             | 114                          | 107                                                 | 107                                             | 105                                                        | 96                                                    | 7                                                    |
| Regions of transcription-transcription conflicts resolved by Elc1.                 | 144                          | 144                                                 | 144                                             | 137                                                        | 125                                                   | 13                                                   |

|                                                            |     |     |     |     |     |    |
|------------------------------------------------------------|-----|-----|-----|-----|-----|----|
| Tracts of poly A or poly T $\geq$ 25 bp                    | 43  | 41  | 41  | 40  | 36  | 3  |
| Sites of RNA/DNA hybrid accumulation in <i>rnh1 rnh201</i> | 163 | 129 | 129 | 127 | 112 | 10 |

<sup>1</sup>In our analysis, we examined twenty-one types of genomic elements. The references for the locations of these elements are described in Table S9 and in File S1. The total size of the yeast genome, as presented in SGD, is about 12.1 Mb. Since this calculated size counts only two of the approximately 150 ribosomal rRNA genes, there are about 12.1 Mb of single-copy yeast sequences. Our whole-genome microarrays omit most repetitive sub-telomeric repeats. 11.6 Mb of the genome are represented on our whole-genome arrays (details in Dataset S1 of Song *et al.*, 2014). The coordinates and sequences of all oligonucleotides on the whole-genome arrays are in Table S5 of St. Charles *et al.* (2012).

<sup>2</sup>In several of the mutant strains, LOH events existed in the starting strains. These regions were omitted from the analysis. The summary of these omissions is: 1) *rnh201* $\Delta$  (no pre-existing LOH events, therefore, no omissions necessary), 2) *rnh201* $\Delta$  *pol2-M644L* (sequences distal to SGD coordinate 592645 on chromosome XIII were homozygous and deleted from the analysis; 11.3 Mb were in the remaining analysis), and 3) *rnh1 rnh201* (most of these strains had terminal LOH events beginning at SGD coordinate 1263027 on chromosome IV, and coordinate 447834 on chromosome XII; the remaining portion of the genome was about 11.0 Mb). The numbers of elements in each strain were corrected for these deletions.

<sup>3</sup>The chromosome IV-specific microarrays monitor SNPs from *CEN4* to near the right telomere of chromosome IV (coordinate 1511708), a region of about 1.1 Mb). The locations of SNPs on the chromosome IV-specific arrays are in Table S9 of St. Charles and Petes (2013).
