# Supplementary material
Source: PubMed Central journal article supplement (PMC4649664)
Supplement: supp_115.182725_TableS11.pdf [file supp_115.182725_TableS11.pdf]

**Table S11. Association of LOH events in sub-cultured strains with various genomic elements.**

| Genome Feature                                                          | <i>rnh201Δ</i>      |                     |         | <i>rnh201Δ pol2-M644L</i> |                     |         | <i>rnh1Δ rnh201Δ</i> |                     |         |
|-------------------------------------------------------------------------|---------------------|---------------------|---------|---------------------------|---------------------|---------|----------------------|---------------------|---------|
|                                                                         | Exp inside: outside | Obs inside: outside | p-value | Exp inside: outside       | Obs inside: outside | p-value | Exp inside: outside  | Obs inside: outside | p-value |
| Ty elements                                                             | 8:904               | 7:905               | 0.863   | 5:811                     | 6:810               | 0.823   | 9:761                | 5:765               | 0.240   |
| Solo LTRs                                                               | 33:5287             | 24:5296             | 0.138   | 22:4670                   | 12:4680             | 0.042   | 51:5779              | 66:5764             | 0.041   |
| Centromeres                                                             | 2:302               | 0:304               | 0.286   | 1:271                     | 3:269               | 0.133   | 3:349                | 3:349               | 1.000   |
| Intron- containing genes                                                | 39:6250             | 30:6259             | 0.173   | 26:5465                   | 22:5469             | 0.493   | 60:6738              | 59:6739             | 1.000   |
| ARS elements                                                            | 37:5986             | 31:5992             | 0.362   | 25:5211                   | 19:5217             | 0.269   | 57:6367              | 54:6370             | 0.729   |
| tRNA genes                                                              | 32:5174             | 22:5184             | 0.092   | 22:4568                   | 16:4574             | 0.238   | 50:5626              | 48:5628             | 0.823   |
| Long genes                                                              | 46:5768             | 45:5769             | 0.920   | 31:4984                   | 35:4980             | 0.527   | 72:6220              | 67:6225             | 0.597   |
| Genes with high transcription                                           | 39:6212             | 35:6216             | 0.578   | 25:5381                   | 25:5381             | 1.000   | 58:6564              | 63:6559             | 0.554   |
| Genes with low transcription                                            | 37:5891             | 37:5891             | 1.000   | 24:5127                   | 27:5124             | 0.610   | 57:6367              | 51:6373             | 0.467   |
| ORFs with high GC content                                               | 14:2171             | 9:2176              | 0.227   | 9:1929                    | 15:1923             | 0.066   | 20:2246              | 14:2252             | 0.218   |
| High G content on the non-transcribed strand                            | 5:774               | 4:775               | 0.823   | 3:677                     | 1:679               | 0.387   | 7:763                | 9:761               | 0.572   |
| Sites of Rbp3 accumulation in S phase                                   | 11:1756             | 11:1756             | 1.000   | 7:1574                    | 6:1575              | 0.842   | 16:1766              | 20:1762             | 0.377   |
| TER sites                                                               | 8:1341              | 5:1344              | 0.377   | 6:1167                    | 8:1165              | 0.538   | 18:1500              | 15:1503             | 0.554   |
| TER sites related to high transcription                                 | 9:1093              | 5:1097              | 0.242   | 6:946                     | 5:947               | 0.842   | 14:1218              | 11:1221             | 0.498   |
| Sites of Rrm3 accumulation in S phase                                   | 13:2115             | 17:2111             | 0.330   | 9:1895                    | 12:1892             | 0.406   | 21:2311              | 12:2320             | 0.063   |
| Palindromic sequences                                                   | 70:11121            | 80:11111            | 0.254   | 46:9695                   | 42:9699             | 0.603   | 110:12320            | 85:12345            | 0.008   |
| Sites of G4 quadruplex formation (predicted <i>in silico</i> )          | 64:10253            | 45:10272            | 0.020   | 43:9069                   | 47:9065             | 0.597   | 99:11121             | 73:11147            | 0.010   |
| Regions of differential transcription in response to NMM                | 13:2020             | 12:2021             | 0.888   | 8:1777                    | 5:1780              | 0.377   | 20:2246              | 15:2251             | 0.313   |
| Regions of transcription-transcription conflicts resolved by Elc1       | 17:2719             | 18:2718             | 0.920   | 11:2318                   | 18:2311             | 0.050   | 27:2987              | 25:2989             | 0.777   |
| Regions of RNA/DNA hybrid accumulation in the <i>rnh1 rnh201</i> mutant | 15:2436             | 14:2437             | 0.888   | 10:2149                   | 13:2146             | 0.427   | 24:2660              | 28:2656             | 0.475   |
| Poly A or poly T tracts $\geq$ 25 bp                                    | 5:774               | 8:771               | 0.262   | 3:677                     | 2:678               | 0.777   | 8:850                | 6:852               | 0.597   |

The details of the association analysis are described in File S1. In brief, we summed the amount of sequences inside the LOH association windows and the amount of sequences located outside of those windows for all isolates of the individual mutant strains. Based on the total number of elements examined by the array (Table S10), we calculated the number of elements expected within and outside of those windows; this information is summarized in the column labeled “Exp inside:outside.” We then counted the elements within and outside of the association windows (Column “Obs inside:outside”). The observed and expected values were compared using Chi-square “Goodness of Fit” test. Because of the multiple comparisons, we then applied the Benjamini-Hochberg correction to the data (Benjamini and Hochberg, 1995). Following this correction, none of the LOH events in any of the strains were significantly associated with any of the tested genomic elements.
