# Supplementary material
Source: PubMed Central journal article supplement (PMC4649664)
Supplement: supp_115.182725_TableS12.pdf [file supp_115.182725_TableS12.pdf]

**Table S12. Association of LOH events in sectored colonies with various genomic elements on the right arm of chromosome IV**

| Genome Feature                                                               | <i>rnh201</i> Δ             |                                |         | <i>rnh1</i> Δ <i>rnh201</i> Δ  |                                |         |
|------------------------------------------------------------------------------|-----------------------------|--------------------------------|---------|--------------------------------|--------------------------------|---------|
|                                                                              | expected inside:<br>outside | observed<br>inside:<br>outside | p-value | expected<br>inside:<br>outside | observed<br>inside:<br>outside | p-value |
| Ty elements                                                                  | 3:165                       | 2:166                          | 0.777   | 3:109                          | 4:108                          | 0.777   |
| Solo LTRs                                                                    | 5:394                       | 3:396                          | 0.498   | 7:259                          | 10:256                         | 0.340   |
| Centromeres                                                                  | 0:21                        | 0:21                           | 1.000   | 0:14                           | 0:14                           | 1.000   |
| Intron-containing genes                                                      | 7:497                       | 8:496                          | 0.841   | 8:328                          | 12:324                         | 0.210   |
| ARS elements                                                                 | 8:580                       | 9:579                          | 0.862   | 10:382                         | 7:385                          | 0.420   |
| tRNA genes                                                                   | 6:477                       | 5:478                          | 0.585   | 8:314                          | 9:313                          | 0.862   |
| Long genes                                                                   | 10:578                      | 15:573                         | 0.150   | 11:381                         | 13:379                         | 0.647   |
| Genes with high transcription                                                | 10:746                      | 8:748                          | 0.632   | 13:491                         | 17:487                         | 0.327   |
| Genes with low transcription                                                 | 6:414                       | 4:416                          | 0.532   | 7:273                          | 4:276                          | 0.340   |
| ORFs with high GC content                                                    | 2:166                       | 1:167                          | 0.718   | 3:109                          | 1:111                          | 0.380   |
| Regions with high G content on the non-transcribed strand                    | 0:21                        | 0:21                           | 1.000   | 0:14                           | 1:13                           | 1.000   |
| Sites of Rbp3 accumulation in S phase                                        | 3:228                       | 3:228                          | 1.000   | 4:150                          | 3:151                          | 0.806   |
| TER sites                                                                    | 1:62                        | 1:62                           | 1.000   | 1:41                           | 1:41                           | 1.000   |
| TER sites related to high transcription                                      | 1:62                        | 1:62                           | 1.000   | 1:62                           | 1:62                           | 1:62    |
| Sites of Rrm3 accumulation in S phase                                        | 2:124                       | 1:125                          | 0.718   | 2:82                           | 1:83                           | 0.718   |
| Palindromic sequences                                                        | 14:1057                     | 17:1054                        | 0.498   | 18:696                         | 27:687                         | 0.043   |
| Sites of G4 quadruplex formation                                             | 6:414                       | 6:414                          | 1.000   | 7:273                          | 9:271                          | 0.566   |
| Regions of differential transcription in response to NMM                     | 2:145                       | 1:146                          | 0.718   | 2:96                           | 2:96                           | 1.000   |
| Regions of t ranscription-transcription conflicts resolved by E1c1           | 4:269                       | 4:269                          | 1.000   | 5:177                          | 8:174                          | 0.256   |
| Sites of RNA/DNA hybrid accumulation in the <i>rnh1</i> <i>rnh201</i> mutant | 3:207                       | 4:206                          | 0.777   | 4:136                          | 7:133                          | 0.206   |
| Poly A or poly T tracts ≥ 25bp                                               | 1:62                        | 1:62                           | 1.000   | 1:41                           | 2:40                           | 0.610   |

The associations were examined by the same methods described in Table S11, except analysis was limited to the right arm of chromosome IV. None of the associations was statistically significant after applying the correction for testing multiple samples.
